## *Environmental monitoring of Legionella*

1            Environmental monitoring of Legionella in constructed water systems  
2            Samara Bin Salem<sup>1</sup>, Abdullah Siddiqui<sup>1</sup>, and Premanandh Jagadeesan<sup>\*1</sup>,

4

5

*1. Central Testing Laboratories,*

6

*Quality and Conformity Council*

7

*P.O Box 853, Abu Dhabi, United Arab Emirates*

8

*Abu Dhabi, United Arab Emirates*

9

10

*\*Corresponding Author: [jpremanandh@gmail.com](mailto:jpremanandh@gmail.com)*

11

12

13

14

15

16

17

18

19

20

21

22

23

24

25

## *Environmental monitoring of Legionella*

### 26 **Abstract**

27 Legionella is an opportunistic pathogen found in aquatic environments having  
28 profound health significance. Policy regulation mandates environmental  
29 monitoring for prevention and control of *Legionella* spp. in different types of water  
30 systems. The current study reports the trends of environmental monitoring of  
31 *Legionella* in constructed water system from the Emirate of Abu Dhabi. Sample  
32 collection and processing were performed as per standard procedures. A total of  
33 8849 samples have been utilized during the 5 years study period of which 653  
34 (7.4%) samples were positive for *Legionella* spp. The presence and frequency of  
35 different serogroups are presented. The relationship between residual chlorine  
36 levels and the presence of Legionella are discussed. The data indicates that  
37 most positive Legionella cases occur with residual chlorine levels of less than 0.2  
38 mg/L while higher chlorine concentrations are associated with fewer Legionella-  
39 positive cases. In conclusion, environmental monitoring is very important  
40 to assess the trends of water quality for any remedial measures.

42

43

44 Key words: *Legionella* spp; environmental monitoring, residual chlorine, colony  
45 forming units; actionable limit; serogroup

46

47

48

## *Environmental monitoring of Legionella*

### 49 **Introduction**

50 Legionella is an opportunistic pathogen found naturally in the environments.  
51 Presence of *Legionella* in aquatic environments is of profound health significance  
52 as the exposure may lead to Legionnaires' disease, a severe form of pneumonia,  
53 and Pontiac fever, a milder illness resembling the flu. The disease can be fatal at  
54 times, particularly for immunocompromised individuals and people with chronic  
55 illnesses [1].

56 As a result, regulators across the globe have established management programs  
57 on an ad hoc basis or mandated routine monitoring by law. Guidelines have been  
58 developed to provide frameworks for risk assessment, management, and  
59 prevention strategies tailored to different types of water systems [2]. For  
60 instance, the World Health Organization (WHO), recommended water safety plan  
61 (WSP) which includes specifications for construction and commissioning of  
62 building water systems [3]. However, the guideline lacks threshold limits for  
63 Legionella unlike other microbial pathogens in water [4]. While guidelines are  
64 usually advisory and not necessarily prompt enforcement, the European Union  
65 Drinking Water Directive mandates monitoring of *Legionella* bacteria in all  
66 drinking water distribution systems, including large domestic water and industrial  
67 distribution systems. The parametric value of Legionella was <1000 CFU/L above  
68 which resampling should be performed and screened for *L. pneumophila* [5]. In the  
69 USA, there are no nationwide regulations for *Legionella* management [6].  
70 Nevertheless, Center for disease control (CDC) has recommended a

## *Environmental monitoring of Legionella*

71 multifactorial approach as performance indicator interpretation. Accordingly,  
72 detection of up to 0.9 CFU/mL in a few of many tested locations within a water  
73 system is considered well controlled. The facility is considered as poorly  
74 controlled when more than 1CFU – 9.9 CFU/ml is found and above 10 CFU/ml is  
75 uncontrolled in potable water [7].

76 In Abu Dhabi, United Arab Emirates (UAE), the department of energy is the  
77 competing authority responsible for setting policy, standards and regulation for  
78 the energy sector which includes water. The regulation states a comprehensive  
79 risk assessment and periodic monitoring as effective means to ensure water  
80 safety which specifies a zero tolerant policy for wholesome water [8]. In the case  
81 of health care sector, all healthcare facilities are mandated to comply with water  
82 quality testing twice a year and notify Abu Dhabi Public Health Center (ADPHC)  
83 of any positive results. The current study aims to report the status of  
84 environmental monitoring of Legionella in constructed water system from the  
85 Emirate of Abu Dhabi.

## 86 **Materials and Methods**

### 87 *Sample collection*

88 Samples were collected in accordance with BS 7592:2022. Briefly, one liter of  
89 pre-flush samples was collected immediately after a tap or fitting is opened while  
90 dip samples were collected by immersing 1-L sterile container into a body of  
91 water depending on the sample source. All presterilized sample bottles contained  
92 0.01% sodium thiosulfate to neutralize residual chlorine. The samples were

## *Environmental monitoring of Legionella*

93 labelled and transported in insulated containers to the laboratory for culture  
94 analysis as per ISO 11731-2: 2017.

96

### *Sample Processing*

98 Water samples were concentrated by membrane filtration using polycarbonate  
99 filters with a porosity of 0.2 µm. The filters were then transferred onto plates of  
100 the chosen culture medium selective for Legionella (BCYE Agar) and incubated  
101 at 37 ±1°C for 7-10 days. After the incubation period, morphologically  
102 characteristic colonies on the selective culture media were regarded as  
103 presumptive *Legionella* and were subjected to subculture to demonstrate their  
104 growth requirement for L-cysteine and iron (III) and species identification by  
105 LATEX agglutination. The confirmed number of *Legionella* were reported as  
106 colony forming units (CFU) of *Legionella* sp. or serogroups.

### *Residual Chlorine*

108 For the detection of residual chlorine, dpd (diethyl paraphenylene diamine)  
109 indicator test is applied. The colorimetric method measures the intensity of color  
110 produced when dpd reacts with residual chlorine. The intensity of the color  
111 produced is proportional to the concentration of the chlorine in the sample. The  
112 results are expressed as mg/l with two decimal points.

### *Statistical Analysis*

114 A descriptive statistical analysis was performed using Microsoft Excel. Non-  
115 parametric Mann–Whitney U test was conducted to establish the correlation

## *Environmental monitoring of Legionella*

116 between Legionella and residual chlorine (expressed in mg/L). The statistical  
117 results were interpreted at the level of significance  $p < 0.05$ .

### 118 **Results and discussion**

119 Sampling and testing are the crucial step through which the effectiveness of  
120 water quality maintenance procedure is verified. Therefore, regulatory authorities  
121 enforce periodic monitoring of Legionella to assess the status in the Emirate of  
122 Abu Dhabi. While new rapid method such as real-time PCR analysis are best  
123 suited for well managed containment zones, culture is still regarded as the “gold  
124 standard” despite long incubation period as it provides concentration of cultivable  
125 *Legionella* which aids in risk management [9].

126 A total of 8849 samples have been utilized during the 5 years study period. The  
127 samples were taken from either taps or cistern of the respective collection  
128 location. Out of the 8849 samples collected, 653 (7.4%) samples were positive  
129 for *Legionella* spp. Further analysis revealed *L. pneumophila* serogroup 2-14 with  
130 a frequency of 19.6% while *L. pneumophila* serogroup 1 was found only in 2.8%  
131 of all positive samples. The number of samples analyzed during the study period  
132 and percentage of positive samples are presented in fig.1. It is evident from the  
133 results that *Legionella* persists in some sampling locations. Nevertheless, only 33  
134 samples (0.4%) were in the range of 100-800 cfu/L while the remaining samples  
135 were between of 1-99 cfu/L (Table. 1). The actionable threshold of Legionella  
136 varies ranging from  $10^2$  to  $10^5$  cfu/L in potable water across Europe, UK and USA  
137 [10]. Since Abu Dhabi has adapted a zero tolerant policy, any presence of  
138 *Legionella* requires disinfection-based control measures to curb colonization. The

## *Environmental monitoring of Legionella*

139 infective dose of *Legionella* is a subject of debate [11] and hence such stringent  
140 measures are deemed necessary especially when there is no known safe level  
141 of *Legionella* in the water systems.

142 As far as the residual chlorine levels are concerned, there is a statistically  
143 significant difference between Legionella-positive and Legionella-negative  
144 samples ( $p$ -value  $< 0.05$ ). The median chlorine level in Legionella-positive  
145 samples (0.1200 mg/L) is notably lower than in Legionella-negative samples  
146 (0.2260 mg/L). The analysis strongly suggests an inverse relationship between  
147 residual chlorine levels and the presence of Legionella in water samples. For  
148 instance, higher chlorine levels are associated with a lower likelihood of  
149 Legionella presence. The data indicates that most positive Legionella cases  
150 occur with residual chlorine levels less than 0.2 mg/L. As the chlorine  
151 concentration increases, the number of positive cases decreases, with the lowest  
152 number of cases in the category with chlorine levels of 0.5 mg/L (Fig. 2). This  
153 trend suggests that higher chlorine levels are associated with fewer Legionella-  
154 positive cases. The results signify the role of residual chlorine in the disinfection  
155 process and control of *Legionella* in constructed water bodies. The result from  
156 the study corroborates with previous studies on effective chlorine levels [12, 13]  
157 and reinstates the need of monitoring and maintaining the residual chlorine  
158 between 0.2-0.5 mg/L [8]. The stringent quality monitoring by both water and  
159 health care regulators mandating testing regime every 6 months has been a  
160 crucial tool to ensure the delivery of safe and good quality water to consumers.

161 **Concluding remarks**

## *Environmental monitoring of Legionella*

162 A positivity rate of 7.4% has been observed over the study period with a surge in  
163 2023 and 2024 emphasizing the impact of environmental monitoring of  
164 constructed water systems. This study further confirms the significance of  
165 maintaining residual chlorine between 0.2-0.5 mg/L as an effective means to  
166 control *Legionella* as recommended by the regulator. However, further  
167 investigation should reveal the resilience of these organism especially in areas  
168 where adequate concentration of chlorine is maintained.

169

## 170 **Acknowledgments**

171 The authors gratefully acknowledge the support and encouragement of the Abu  
172 Dhabi Quality and Conformity Council. Gratitude is also extended to the  
173 management of Central Testing Laboratories (CTL) for invaluable support.

174

## 175 **References**

- 176 1. Viasus, D., Gaia, V., Manzur-Barbur, C. *et al.* 2022. Legionnaires' Disease:  
177 Update on Diagnosis and Treatment *Infect Dis Ther*, **11**: 973–986.  
178 <https://doi.org/10.1007/s40121-022-00635-7>
- 179 2. Sciuto, E., L, Laganà, P., Filice, S., Scalese, S., Libertino, S., Corso, D., Faro,  
180 G., and Coniglio, M. A. 2021. Environmental Management of *Legionella* in  
181 Domestic Water Systems: Consolidated and Innovative Approaches for  
182 Disinfection Methods and Risk Assessment. *Microorganisms*, **9**(3):577.
- 183 3. World Health Organization. 2007. Legionella and the prevention of  
184 legionellosis. World Health Organization. <https://iris.who.int/handle/10665/43233>



## *Environmental monitoring of Legionella*

- 185 4. Van Kenhove E, Dinne K, Janssens A, Laverge J. 2019. Overview and  
186 comparison of Legionella regulations worldwide. *Am J Infect Control*, 47(8):968-  
187 978.
- 188 5. European Parliament and of the Council. Directive (EU) 2020/2184 of the  
189 European Parliament and of the Council of 16 December 2020 on the Quality of  
190 Water Intended for Human Consumption. *Official Journal of the European Union*  
191 (2020). p. 435.
- 192 6. National Academies of Sciences, Engineering, and Medicine; Health and  
193 Medicine Division; Division on Earth and Life Studies; Board on Population  
194 Health and Public Health Practice; Board on Life Sciences; Water Science and  
195 Technology Board; Committee on Management of Legionella in Water Systems.  
196 Management of Legionella in Water Systems. Washington (DC): National  
197 Academies Press (US); 2019 Aug 14. 5, Regulations and Guidelines on  
198 Legionella Control in Water Systems.  
199 <https://www.ncbi.nlm.nih.gov/books/NBK555112/>
- 200 7. Centers for Disease Control and Prevention. (2017). *Developing a water*  
201 *management program to reduce Legionella growth and spread in buildings: A*  
202 *practical guide to implementing industry standards*  
203 <https://www.cdc.gov/legionella/maintenance/wmp-toolkit.html>
- 204 8. Department of Energy. 2021. Water quality regulations (Fifth edition). Available  
205 at: [https://www.doe.gov/~/media/Project/DOE/Department-Of-Energy/Media-](https://www.doe.gov/~/media/Project/DOE/Department-Of-Energy/Media-Center-Publications/Regulations/English/Water-Quality-Regulations-2021-Edition-5.pdf)  
206 [Center-Publications/Regulations/English/Water-Quality-Regulations-2021-](https://www.doe.gov/~/media/Project/DOE/Department-Of-Energy/Media-Center-Publications/Regulations/English/Water-Quality-Regulations-2021-Edition-5.pdf)  
207 [Edition-5.pdf](https://www.doe.gov/~/media/Project/DOE/Department-Of-Energy/Media-Center-Publications/Regulations/English/Water-Quality-Regulations-2021-Edition-5.pdf)

## *Environmental monitoring of Legionella*

- 208 9. Díaz-Flores, Á.; Montero, J.C.; Castro, F.J.; Alejandres, E.M.; Bayón, C.; Solís,  
209 I.; Fernández-Lafuente, R.; Rodríguez, G. 2015. Comparing methods of  
210 determining *Legionella* spp. in complex water matrices. *BMC Microbiol*, 15:1–9.
- 211 10. Hamilton, K. A., Hamilton, M. T., Johnson, W., Jjemba, P., Bukhari, Z.,  
212 LeChevallier, M., Haas, C. N., and Gurian, P. L. 2019. Risk-Based Critical  
213 Concentrations of *Legionella pneumophila* for Indoor Residential Water Uses.  
214 *Environ Sci Technol*, 53(8):4528-4541.
- 215 11. Nisar, M. A., Ros, K.E., Brown, M. H., Bentham, R., Best, G., Xi, J., Hinds, J.,  
216 and Whiley, H. 2023. Stagnation arising through intermittent usage is associated  
217 with increased viable but non culturable *Legionella* and amoeba hosts in a  
218 hospital water system. *Front Cell Infect Microbiol*,13:1190631.
- 219 12. Doménech-Sánchez, A., Laso, E., and Albertí, S. 2022. Determination of  
220 *Legionella* spp. prevalence in Spanish hotels in five years. Are tourists really at  
221 risk? *Travel Medicine and Infectious Disease*, 46:102269.
- 222 13. Marras, L., Bertolino, G., Sanna, A., Carraro, V., and Coroneo, V. 2023.  
223 *Legionella* spp. Monitoring in the Water Supply Systems of Accommodation  
224 Facilities in Sardinia, Italy: A Two-Year Retrospective Analysis. *Int J Environ Res*  
225 *Public Health*, 20(18):6722.
- 226
- 227
- 228
- 229

Fig. 1

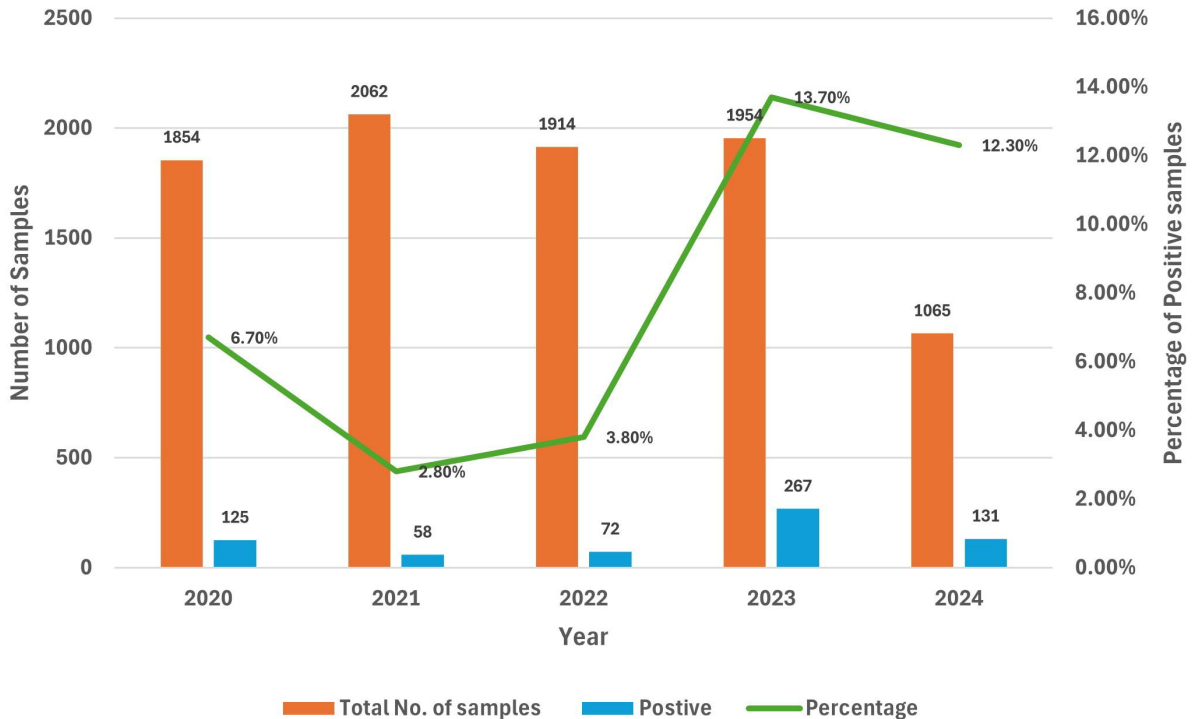

Fig. 2

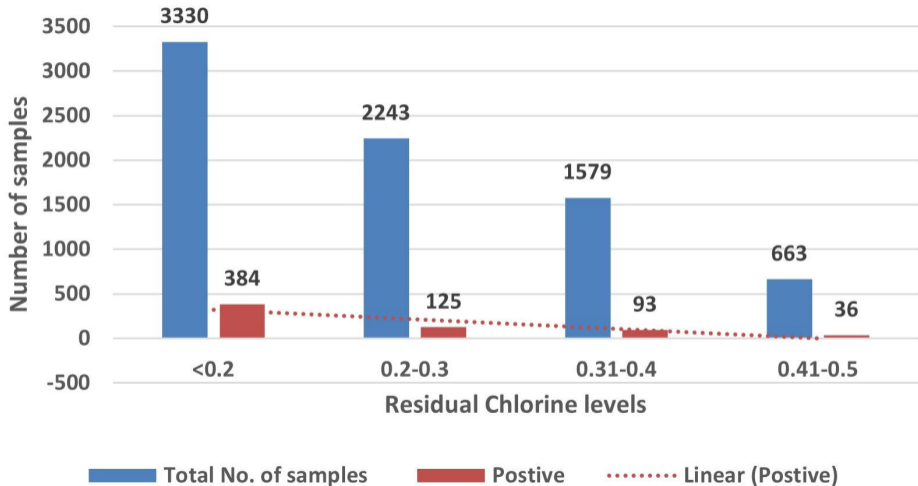

Source: https://medrxiv.org/content/10.1101/2024.11.12.24317151v1.full.pdf
